# Supplementary material for: Cryo‐electron Microscopy Imaging of Alzheimer's Amyloid‐beta 42 Oligomer Displayed on a Functionally and Structurally Relevant Scaffold
Source: PubMed Central journal article supplement — Angew Chem Int Ed Engl. 2021 Jul 12;60(34):18680–7. doi: 10.1002/anie.202104497 (PMC8457241; doi:10.1002/anie.202104497), 2021-07-12
Supplement: ANIE-60-18680-s001.pdf [file ANIE-60-18680-s001.pdf]

## Supporting Information

### **Cryo-electron Microscopy Imaging of Alzheimer's Amyloid-beta 42 Oligomer Displayed on a Functionally and Structurally Relevant Scaffold**

*Jinming Wu, Thorsten B. Blum, Daniel P Farrell, Frank DiMaio, Jan Pieter Abrahams, and Jinghui Luo\**

anie\_202104497\_sm\_miscellaneous\_information.pdf

## SUPPORTING INFORMATION

## Table of Contents

|                                                                                                                                         |    |
|-----------------------------------------------------------------------------------------------------------------------------------------|----|
| Table of Contents .....                                                                                                                 | 2  |
| Experimental Procedures .....                                                                                                           | 2  |
| Plasmid preparation for the expression of wild type $\alpha$ HL oligomers, and $\alpha$ HL-displayed A $\beta$ or hIAPP oligomers ..... | 2  |
| Protein expression and purification .....                                                                                               | 3  |
| LC-MS .....                                                                                                                             | 3  |
| ANS fluorescence assay .....                                                                                                            | 3  |
| Preparation of the A $\beta$ 42 and hIAPP peptides .....                                                                                | 3  |
| ThT fluorescence assay .....                                                                                                            | 4  |
| Limited proteolysis of wild type $\alpha$ HL and hybrid A $\beta$ /hIAPP- $\alpha$ HL oligomers .....                                   | 4  |
| Hemolysis assays .....                                                                                                                  | 4  |
| Single-channel electrical recording .....                                                                                               | 4  |
| Western blot .....                                                                                                                      | 4  |
| Cell viability assay .....                                                                                                              | 5  |
| Single-particle Cryo-EM .....                                                                                                           | 5  |
| Structure modelling .....                                                                                                               | 5  |
| Results and Discussion .....                                                                                                            | 6  |
| References .....                                                                                                                        | 19 |
| Author Contributions .....                                                                                                              | 19 |

## Experimental Procedures

Plasmid preparation for the expression of wild type (WT)  $\alpha$ HL oligomers, and  $\alpha$ HL-displayed A $\beta$  or hIAPP oligomers

The plasmid encoding A $\beta$ 42 sequence was obtained from Sara Linse's group in Lund and the pET20b (+) plasmid for WT  $\alpha$ HL with D8H6 tag expression in *E. coli* was commercially constructed by TOP Gene Technologies, Inc. The synthetic genes for A $\beta$ 42 sequence and the moiety sequence of  $\alpha$ HL with overhangs were produced by using Phusion® High-Fidelity DNA Polymerase with the primers as below. PCR was carried out for A $\beta$ 42 in the conditions: 30 s at 98°C, 30 cycles of 98°C for 10 s, 72 °C for 5 s. The similar conditions were used for  $\alpha$ HL part, except 30 cycles of 98°C for 10 s, 60°C for 10 s, 72°C for 2 min 15 s, as well as a final elongation at 72°C for 5 min.

According to the manufacturing protocol, NEBuilder® HiFi DNA Assembly Master Mix was used to assemble the DNA fragments of  $\alpha$ HL and A $\beta$ 42/hIAPP with overhangs, followed by the digestion of template DNA with DpnI enzyme. NEB 5-alpha Competent *E. coli* were transformed with 2  $\mu$ l of the assembled products for over-night incubation at 37°C, yielding colonies on the plate with ampicillin and then for the sequence validation. The other A $\beta$  fragments and  $\alpha$ HL hybrid sequences with overhangs were generated by using Phusion® High-Fidelity DNA Polymerase with the following primers. Following the same procedure of A $\beta$ 42- $\alpha$ HL, we fully assembled single linear sequence by using NEBuilder® HiFi DNA Assembly Master Mix for the transformation and yielding colonies. The DNA sequence of hIAPP with overhangs was synthesised by Sigma. The synthetic genes were amplified following by the same procedure as the A $\beta$ 42.

**WT  $\alpha$ HL primers**

5' TATGT TCAAC CTGAT TTCAA AACAA TTTAGAGAGCCCCA  
3' ATTTCTTGGATAGTAATCAGATATTTGAGCTACTTCATTATCAG

**A $\beta$ 42- $\alpha$ HL primers**

5' TACTATCCAAGAAATGACGCTGAATTCGTCACGACTCTG  
3' ATCAGGTTGAACATAAGCGATCACAACGCCACCAACCATCA

**hIAPP- $\alpha$ HL primers**

5' ATTGATACAAAAAATGCAACACTGCCACA  
3' ATCAG GTTGA ACATAATATGTATTG

**The DNA sequence of hIAPP with overhangs**

(AAATTTCGATTGATACAAAAAATGCAACACTGCCACATGTGCAACGCAGCGCCTGGCAAATTTTTAGTTTCATTCCAGCAACAAC  
TTTGGTGCCATTCTCTCATCTACCAACGTGGGATCCAATACATATTATGT TCAACCTGATTTCAAACAA)

## SUPPORTING INFORMATION

**A $\beta$ 0- $\alpha$ HL**

5' TCCAAGAAATTATGTTCAACCTGATTTCAAACAA  
 3' ATCAG GTTGA ACATA ATTTCTGGATAGTAATCAGATATTTGAG

**A $\beta$ 1-17- $\alpha$ HL**

5' CCAGAAGCTGTATGTTCAACCTGATTTCAAACAA  
 3' ATCAGGTTGAACATACAGCTTCTGGTGGTGAAC

**A $\beta$ 1-28- $\alpha$ HL**

3' TCAGGTTGAACATACTTGTTAGAACCCACGTCTTC  
 5' GTTCTAACAAGTATGTTCAACCTGATTTCAAACAA

**A $\beta$ 11-42- $\alpha$ HL**

5' TCCAAGAAATGAAGTTCACCACCAGAAGC  
 3' CTGGTGGTGAACCTTCATTTCTGGATAGTAATCAGATATTTG

**Protein expression and purification**

The verified  $\alpha$ HL plasmids were transformed into competent *E. coli* BL21(DE3) pLysS cells. The cells were incubated on an ampicillin plate (100  $\mu$ g/mL) overnight at 37 °C. Then a single colony was picked for incubation with LB medium (200 mL) at 37 °C, 180 rpm until the OD600 reached around 0.6. The incubation temperature was set to 18 °C for the overnight expression induced by IPTG (final conc. 0.5 mM). The cell pellets were harvested and lysed in lysis buffer (50 mM Tris-HCl, pH 8.0, 0.5 M NaCl, 0.38 mM DDM, 10 mM imidazole) on ice with the addition of a final concentration of 5 mM MgCl<sub>2</sub>, 1 mg/mL lysozyme and 100 units benzonase (Cat. Number: E1014). The lysis was sonicated three times for each 30 seconds, and centrifuged at 24000g for 1 h to remove cell debris. The immobilized metal-affinity chromatography was used to purify  $\alpha$ HL in a high-specificity affinity TALON (Cobalt) column. The supernatant was incubated with the resin for at least 1 h at 4 °C. To increase the purity of heptameric  $\alpha$ HL, Co-NTA chromatography imidazole gradient fractionation (20 mM, 50 mM and 250 mM) was used to elute  $\alpha$ HL. SDS-gel (4-20% or 4-12%) electrophoresis was used to determine the elution of monomeric and heptameric  $\alpha$ HL. Protein concentration was measured by the Nanodrop Spectrophotometer (ND-2000, Thermo Scientific) at the wavelength of 280 nm. Then the proteins were aliquoted on ice and frozen in liquid N<sub>2</sub> immediately for storage at -80 °C. For the hybrid A $\beta$ /hAPP- $\alpha$ HL oligomers, the expression and purification methods were the same with wild type  $\alpha$ HL. TCEP was added into the lysis buffer (final conc. 0.5 mM) and elution buffer (final conc. 1 mM) when purifying the hAPP- $\alpha$ HL oligomer. The procedure was prepared according to the published paper [1].

**LC-MS**

The purified proteins including wild type  $\alpha$ HL and hybrid A $\beta$ /hAPP- $\alpha$ HL were identified by LC-MS. ESI-TOF MS (LCT Premier Mass Spectrometer, Waters AG, Baden-Dättwil, Switzerland) was combined with the liquid chromatography (LC, Waters 2795). A gradient of ACN/water in the presence of 0.1% formic acid was prepared for the MassPREP Phenyl Guard Column (Waters n°186002785) or the C18 Aeris widepore column (Phenomenex). The obtained MS spectrums for multiply charged protein ions were deconvoluted by using MAXent1 software to obtain the protein mass.

**ANS fluorescence assay**

The oligomerization of hybrid A $\beta$ /hAPP- $\alpha$ HL in the solution of 50 mM Tris-HCl, pH 8, 0.5 M NaCl, 0.38 mM DDM, 250 mM imidazole was determined by ANS fluorescence assay on the Synergy™ 4 (BioTek) plate reader. 40  $\mu$ L solution at the final concentration of 10  $\mu$ M hybrid A $\beta$ /hAPP- $\alpha$ HL and 20  $\mu$ M ANS was prepared on the unsealed OptiPlate™-384 well plate with the material of polystyrene (flat and non-transparent bottom, white, PerkinElmer company, catalogue No.: 6007290). ANS fluorescence was measured with excitation wavelength at 350 nm and emission wavelength at 490 nm. As a control, the buffer was added with 50 mM Tris-HCl, pH 8.0, 0.5 M NaCl, 0.38 mM DDM and 250 mM imidazole. Three independent experiments were conducted.

**ThT fluorescence assay and transmission electron microscopy (TEM)**

A $\beta$ 42 and hAPP powders were purchased from the rPeptide company (catalogue ID: A-1163-1; Purity >97%) and the AnaSpec company (catalogue ID: AS-60804; Purity >95%) respectively. 1 mg A $\beta$ 42 or 1 mg hAPP was dissolved in 1 mL 10 mM NaOH, followed by the sonication in an ice-water bath for 1 min, as previously described [2]. 50 mM Tris-HCl, pH 8.0, 0.5 M NaCl, 250 mM imidazole with or without 0.38 mM DDM was used to dilute the WT A $\beta$ 42 and hAPP peptides. 50 mM Tris-HCl, pH 8.0, 0.5 M NaCl, 250 mM imidazole and 0.38 mM DDM was used to dilute WT  $\alpha$ HL and hybrid A $\beta$ /hAPP- $\alpha$ HL sequences. 40  $\mu$ L solution was added into a black 384-well, non-treated and flat-bottom microplate with the material of polystyrene (NUNC, Thermo Fisher Scientific, catalogue ID: 24276), which was then sealed with a piece of foil film (Greiner Bio-One GmbH, catalogue No.: 676090). The plate was incubated in a microplate reader (PHERAstar FSX, BMG LABTECH, Germany) at 37 °C without shaking. The final concentration of peptides (WT A $\beta$ 42, hAPP,

## SUPPORTING INFORMATION

$\alpha$ HL and a series of hybrid A $\beta$ /hIAPP- $\alpha$ HL sequences) and ThT was 10  $\mu$ M and 40  $\mu$ M respectively. The excitation and emission wavelengths for ThT assay were set up 430 nm and 480 nm respectively. Buffer with 50 mM Tris-HCl, pH 8.0, 0.5 M NaCl, 0.38 mM DDM and 250 mM imidazole was added as a control. Three independent experiments were conducted.

The end points of ThT assay of WT A $\beta$ 42,  $\alpha$ HL and hybrid A $\beta$ 42- $\alpha$ HL were taken to prepare the TEM samples. Negative-staining method was used to prepare the samples. First, 6  $\mu$ L each sample was dipped on a freshly glow-charged 400-mesh Formvar-carbon coated copper grid and absorbed for 2 min. The excess solution was then removed by a piece of filter paper, and the grids were washed by 20  $\mu$ L ddH<sub>2</sub>O for 30 s. Next, the grids were stained with 6  $\mu$ L 2 % uranyl acetate for 60 s and washed by the 20  $\mu$ L ddH<sub>2</sub>O for 15 s twice. Images were taken with a TEM (JEOL 2010) at an voltage of 200 KV.

### Limited proteolysis of wild type $\alpha$ HL and hybrid A $\beta$ /hIAPP- $\alpha$ HL oligomers

20 mg/mL, 50  $\mu$ L Dioleoylphosphatidylcholine (DOPC, Avanti polar lipids), dioleoylphosphatidylglycerol (DOPG, Avanti polar lipids) mixture at a ratio of 4:1 in pentane was dried by N<sub>2</sub> gas and then put in a desiccator overnight under high vacuum to totally get dried. 1 mL, 10 mM Tris-HCl buffer, pH 8.0 containing 1 mM EDTA was added to suspend the lipid film. To get unilamellar liposomes, the solution was extruded through two 0.1  $\mu$ m polycarbonate membranes (Whatman™). 1,2-diphytanoyl phosphophatidylcholine (DPhPC, Avanti polar lipids) liposomes were prepared using the same method.

10  $\mu$ L, 1 mg/mL DOPC:DOPG liposomes were incubated with 50  $\mu$ L, 0.2 mg/mL wild type  $\alpha$ HL (50 mM Tris-HCl, pH 8, 0.5 M NaCl, 0.38 mM DDM, 20 mM imidazole) or hybrid A $\beta$ /hIAPP- $\alpha$ HL with the same buffer for 2 h at room temperature. 0.1 mg/mL, 2  $\mu$ L proteinase K (Sigma Aldrich) in water solution was added to 20  $\mu$ L of incubating solution at room temperature. After 10 min, 1  $\mu$ L, 40 mM phenylmethanesulfonyl fluoride (PMSF in ethanol, Thermo Scientific) was added to inactivate the proteinase K. Then the solution was heated for 15 min at 95 °C for denaturation. 15  $\mu$ L solution was added into 5  $\mu$ L sample loading buffer (5x) and was run the SDS-gel (4%-20%).

### Hemolysis assays

MBSA buffer (150 mM NaCl and 10 mM MOPS, pH7.4, containing 0.1% BSA) was prepared to wash rabbit blood cells (rRBC) repeatedly on ice and then centrifuged at 1200 rpm for 2 min until the supernatant becomes clear. 1% rRBC solution was freshly prepared before the experiment. The recombinant wild type  $\alpha$ HL and hybrid A $\beta$ 42- $\alpha$ HL oligomers in the solution of 50 mM Tris-HCl, pH 8.0, 0.5 M NaCl, 250 mM imidazole and 0.38 mM DDM were used for the hemolysis assay. 2  $\mu$ L of 1.24 mg/mL wild type  $\alpha$ HL or hybrid A $\beta$ 42- $\alpha$ HL oligomers were mixed with MBSA (98  $\mu$ L) in the first well. Then 50  $\mu$ L was transferred to the second well for the dilution with 50  $\mu$ L MBSA buffer. Repeat this step to the 12<sup>th</sup> well. Then, each well had a volume of 50  $\mu$ L and serially two-fold diluted. To keep the same concentration, 2  $\mu$ L, 35  $\mu$ M A $\beta$ 42 oligomer was added into the first well instead. Then, 50  $\mu$ L fresh 1% rRBC was added into each well. The hemolytic activities of wild type  $\alpha$ HL oligomers, hybrid A $\beta$ 42- $\alpha$ HL oligomers and wild type A $\beta$ 42 oligomers were determined in the non-treated, unsealed and flat-bottom 96-well plate (Greiner Bio-One™, catalogue No.: 655101) with the material of polystyrene on the Synergy™ 4 (BioTek) plate reader. The decrease of absorbance in light scattering at 595 nm was recorded for 2 h at room temperature. The concentration of 50 % lysis to show the specific hemolytic activity (HC50) was calculated. Three independent experiments were conducted.

### Single-channel electrical recording

Single-channel electrical recordings were performed in an apparatus with two Delrin compartments at room temperature. The compartments consist of two sides, cis- (connected with ground electrode) and trans- (connected with voltage electrode) sides, separated by a 25  $\mu$ m thick polytetrafluoroethylene (PTFE) film with a 100  $\mu$ m aperture (Good Fellow Inc., #FP301200). After the painting of the film with 2  $\mu$ L 2% (v/v) hexadecane in pentane, 10  $\mu$ L of DOPC:DOPG mixture (4:1) dissolved in pentane at a concentration of 20 mg/mL was added into the cis and trans parts of the home-made chamber which was filled with 500  $\mu$ L of 10 mM Hepes buffer, pH 7.4 with 1 mM EDTA and 1 M KCl. The black lipid membrane was formed by slowly pipetting the solution. 0.1 mg/mL wild type  $\alpha$ HL or hybrid A $\beta$ 42- $\alpha$ HL oligomers were diluted 100 times in 50 mM Tris-HCl buffer, pH 8, 0.5 M NaCl, 250 mM imidazole and 0.38 mM DDM detergent. Then 5  $\mu$ L diluted samples were added into the grounded cis compartment of the chamber for the recordings which were connected by Ag/AgCl electrodes and amplified by the patch-clamp amplifier (Axopatch 200B, Axon instrument). A lowpass-filter at 5 kHz and a sampling frequency at 10 kHz were applied for the data collection at room temperature by a Digidata 1440A digitizer (Axon instrument). Clampfit software was used for the data analysis.

### Western blot

To obtain the oligomer-enriched A $\beta$ 42, 100  $\mu$ M A $\beta$ 42 was incubated at 37 °C under quiescent conditions for 2 h [3]. 15  $\mu$ L of 1 mg/mL, wild type  $\alpha$ HL or hybrid A $\beta$ /hIAPP- $\alpha$ HL in 50 mM Tris-HCl buffer, pH 8, 0.5 M NaCl, 250 mM imidazole, 0.38 mM DDM were boiled for

## SUPPORTING INFORMATION

5 min at 95 °C. 5 µL, 4x sample loading buffer was mixed and 7 µL was loaded into the SDS-gel (Bio-Rad 4–20% Mini-PROTEAN® TGX™ Precast Protein Gels). The SDS-PAGE Electrophoresis was conducted at 120 V for 80 min. The whole page was then transferred using trans-blot turbo mini 0.2 µm PVDF transfer pack (Bio-Rad, #1704156) on the transfer apparatus. After blocking the membrane with 3% nonfat milk in TBST (10 mM Tris-HCl, pH 8.0, 150 mM NaCl, 0.5% Tween 20) for 1 h, the membrane was incubated with anti-oligomer A11 antibody (1:500) for 2 h. The membrane was washed 3 times for 10 min by TBST buffer. Then the membrane was incubated with a 1:1500 dilution of goat anti-rabbit HRP-conjugated secondary antibody for 1 h. Blots were washed with TBST three times and developed with the chemiluminescent reagent (LumiGLO, Chemiluminescent Substrate Kit) .

### Cell viability assay

Neuroblastoma SH-SY5Y cells were cultured in EMEM medium supplemented with 15 % (v/v) fetal bovine serum, 2 mM Glutamine (final concentration), and 1% (v/v) penicillin/streptomycin. Cells were kept at 37°C, 5 % CO<sub>2</sub> in a petri dish. The maximum passage number is 15 times. 50 µL resuspended cells with 6000 cells/well density were dispensed to a tissue culture treated, flat-bottom 96-well plate (Biofil<sup>R</sup>, Item No.: 011096) with the material of polystyrene. The plated cells were incubated for 24 h at 37°C, 5 % CO<sub>2</sub>. Aβ42 oligomers were prepared by dissolving the powder in PBS [3] or the buffer with DDM (50 mM Tris-HCl, pH 8.0, 0.5 M NaCl, 250 mM imidazole and 0.38 mM DDM) at a concentration of 1 mg/ml followed by the incubation at 37°C for 2 h. 2 µL of Aβ42 oligomers, wild type αHL, hybrid Aβ42-αHL or Aβ11-42-αHL oligomers at a final concentration of 5 µM was added to each well. PBS and buffer (50 mM Tris-HCl, pH 8.0, 0.5 M NaCl, 250 mM imidazole and 0.38 mM DDM) were used as the control. Afterwards, the wells were incubated with the serum-free medium for 48 h, and then the plate was equilibrated at room temperature for 30 min. A volume of CellTiter-Glo luminescent reagent (Promega, cat. G7571) was equally added to the cell culture medium present in each well. This assay has been applied to study the toxicity of Aβ aggregates on SH-SY5Y cells [4]. To induce cell lysis, the plate was put on an orbital shaker for 2 min and incubated at room temperature for 10 min to stabilize the luminescent signal. The luminescent intensity was measured on the PHERAstar 96-well plate reader and performed three independent experiments. Data are represented as the mean S.E.M (standard error of the mean). Two-tailed student's t-test was applied for statistical significance. \*\*P<0.01 (very significant) and \*\*\*P<0.01 (highly significant) were compared to the control.

### Single-particle Cryo-EM

3 µl of the protein solution (4.83 mg/ml protein, 50 mM Tris-HCl, pH 8.0, 0.5 M NaCl, 250 mM imidazole and 0.38 mM DDM) was pipetted onto a glow-discharged UltrAuFoil grid (R 1.2/1.3, Au 300). Grids were blotted for 1 s with blot force 2 and plunge-frozen in liquid ethane using a VitroBot Mark IV (ThermoFisher Scientific) with 100% humidity at 7 °C. Data were acquired on a Titan Krios electron microscope at 300 keV (Thermo Fisher), with a GIF Quantum LS Imaging filter (20 eV slit width), a K2 Summit electron counting direct detection camera (Gatan), using a magnification of 48'540x, resulting in a calibrated pixel size of 1.03Å. The defocus varied between -0.9 and -3.0 µm using SerialEM [5]. For helical reconstruction, 4'284 movies were recorded with a total dose of 55 e-/Å<sup>2</sup> per movie (10 sec exposure in total, 0.2 sec per frame, 50 frames in total). The dose rate was ~5.5 e-/Å<sup>2</sup> per second (~1.1 e-/Å<sup>2</sup> per frame). The Focus software [6] was used to drift-correct and dose-weight using MotionCor2 [7].

The reconstruction was done with RELION 3.0 [8]. We automatically picked 2'438'446 particles from 4'284 micrographs, using RELION 3.0. The particles were extracted using a box size of 200 pixels (~206Å, Table 1). Several rounds of 2D and 3D classification were executed to remove bad particles resulting in 141'366 particles. The particles were used for 3D auto-refine and the beam tilt values for the entire data set and the defocus for each segment was estimated. Afterwards another run of 3D auto-refine was executed followed by Post Process, using a soft-edge mask and an estimated map sharpening B-factor of -124.06 Å<sup>2</sup>, was performed resulting in a map with a resolution of 3.6 Å and 3.3 Å (by the FSC 0.5 and 0.143 criterion; Figure 6B).

### Structure modelling

Three initial models were built by using Modeller 9.24 [9]. The first model was built using the standard protocols using only the αHL heptameric structure (PDB ID: 7AHL). In order to build the second and third models, the hairpin structure of Aβ42 hairpin NMR (PDB ID: 6RHY) was grafted onto the β-barrel region of 7AHL using two separate methods. In the first method, the symmetry of 7AHL was used in order to graft the structure of 6RHY based on the threading of αHL's β-barrel. For the second method, we performed grafting similar to the first method, but did so without the use of the threading information.

The Aβ42-αHL protein chimera was modeled into the cryo-EM density with homology modeling using Rosetta [10]. First, the chimeric sequence was aligned to the 7AHL sequence with hhalign [11] and the alignment was used to thread the chimeric sequence onto the previously described models. These threaded models were unambiguously docked into the cryo-EM density using UCSF chimera [12] and, using the 7AHL pdb as a reference for symmetry, these models were used as templates for symmetric refinement into the density using RosettaCM [13]. 5,000 trajectories of RosettaCM were run (command line and input files described at 10.5281/zenodo.3967686)

## SUPPORTING INFORMATION

---

and the model with the lowest energy was the final model. The same methodology was applied to the manual threading model except for substituting the manual alignment in the initial sequence threading step.

In order to generate the shortened beta barrel models, atom pair distance and angle constraints were applied to shift the hydrogen bonding backbone N and O atoms of the adjacent subunits by 2 residues. These models were coarsely minimized using a custom-made set of constraints and the rosetta scripts Rosetta application. The command lines and example constraint files are also described in further detail at: [10.5281/zenodo.3967686](https://doi.org/10.5281/zenodo.3967686). Finally, these coarse models were refined into the cryo-EM density as templates to RosettaCM with the same methodology as described previously. The score of the 5 top scoring models from all 4 conformations are plotted in Figure S8.

## SUPPORTING INFORMATION

## Results and Discussion

*Wild-type  $\alpha$ HL*

ADSD INIKT<sup>10</sup> TTD I GSNTT<sup>20</sup> V KTGDLV<sup>30</sup> TYDK ENGMHKKV<sup>40</sup> FY SFIDDKNHN<sup>50</sup> K K LLV I RTKG<sup>60</sup> T  
 IAGQYRVYS<sup>70</sup> E EGANKSGLAW<sup>80</sup> PS AFKVQLQL<sup>90</sup> PDN E VAQ I SD<sup>100</sup> YYPRN **SIDT**<sup>110</sup> **K EYM STLTY**<sup>120</sup> **G F**  
**NGNVTGDDTG**<sup>130</sup> **K IGGLIGAN**<sup>140</sup> **V S IGH**<sup>150</sup> **T LKYVQ**<sup>160</sup> PDF K T I L ESP<sup>170</sup> TDKKVGW<sup>180</sup> WKVI FNNMVNQNW<sup>190</sup> G  
 PYDRD SWNPV<sup>200</sup> YGNQLFMKT<sup>210</sup> R NGSMKAADNF<sup>220</sup> LDPNK A SSL L<sup>230</sup> SSGF S P DFA T<sup>240</sup> V IT MD RK AS K<sup>250</sup>  
 QQTNI DVIYE<sup>260</sup> RVRDDYQLHW<sup>270</sup> TSTNW KGTNT<sup>280</sup> KDKWT DRSSE<sup>290</sup> RYKID WEKEE<sup>300</sup> MTNDD DDDDD  
 DHHHHHH

*Wild-type  $\beta$ 42* **DAEFRHDSGY**<sup>10</sup> **EVHHQKL**<sup>20</sup> **VFF AEDVGSN**<sup>30</sup> **KGA IIGLMVGGV**<sup>40</sup> **V IA**

*Hybrid  $\beta$ 42- $\alpha$ HL*

ADSD INIKT G TTD I GSNTT V KTGDLV TYDK ENGMHKKV FY SFIDDKNHN K K LLV I RTKG T  
 IAGQYRVYS E EGANKSGLAW PS AFKVQLQL PDN E VAQ I SD YYPRN **DAEFR** **HDSG Y EVHHQ**  
**KL VFFAEDVG** **SNKGAI IGLM** **VGGVVIAYVQ** PDF K T I L ESP TDKKVGW WKVI FNNMVNQNW G  
 PYDRD SWNPV YGNQLFMKT R NGSMKAADNF LDPNK A SSL L SSGF S P DFA T V IT MD RKASK  
 QQTNI DVIYE RVRDDYQLHW TSTNW KGTNT KDKWT DRSSE RYKID WEKEE MTNDD DDDDD  
 DHHHHHH

*Hybrid  $\beta$ 11-42- $\alpha$ HL*

ADSD INIKT G TTD I GSNTT V KTGDLV TYDK ENGMHKKV FY SFIDDKNHN K K LLV I RTKG T  
 IAGQYRVYS E EGANKSGLAW PS AFKVQLQL PDN E VAQ I SD YYPRN **EVHHQ** **K LVF F AEDVG**  
**SNKGAI IGLM** **VGGVV IAYVQ** PDF K T I L ESP TDKKVGW WKVI FNNMVNQNW PYDRD SWNPV  
 YGNQLFMKT R NGSMKAADNF LDPNK A SSL L SSGF S P DFA T V IT MD RKASK QQTNI DVIYE  
 RVRDDYQLHW TSTNW KGTNT KDKWT DRSSE RYKID WEKEE MTNDD DDDDD DHHHHHH

*Hybrid  $\beta$ 1-28- $\alpha$ HL*

ADSD INIKT G TTD I GSNTT V KTGDLV TYDK ENGMHKKV FY SFIDDKNHN K K LLV I RTKG T  
 IAGQYRVYS E EGANKSGLAW PS AFKVQLQL PDN E VAQ I SD YYPRN **DAEFR** **HDSGY EVHHQ**  
**KL VFFAEDVG** **SNKYV Q PDFK** T I L ESP TDKK V G W K V I F N N M V N Q N W G P Y D R D S W N P V Y G N Q  
 L F M K T R N G S M K A A D N F L D P N K A S S L L S S G F S P D F A T V I T M D R K A S K Q Q T N I D V I Y E R V R D  
 D Y Q L H W T S T N W K G T N T K D K W T D R S S E R Y K I D W E K E E M T N D D D D D D D H H H H H H

*Hybrid  $\beta$ 1-17- $\alpha$ HL*

ADSD INIKT G TTD I GSNTT V KTGDLV TYDK ENGMHKKV FY SFIDDKNHN K K LLV I RTKG T  
 IAGQYRVYS E EGANKSGLAW PS AFKVQLQL PDN E VAQ I SD YYPRN **DAEFR** **HDSGY EVHHQ**  
**KLYVQ PDFKT** I L E S P T D K K V G W K V I F N N M V N Q N W G P Y D R D S W N P V Y G N Q L F M K T R N G S M K  
 A A D N F L D P N K A S S L L S S G F S P D F A T V I T M D R K A S K Q Q T N I D V I Y E R V R D D Y Q L H W T S T N W  
 K G T N T K D K W T D R S S E R Y K I D W E K E E M T N D D D D D D D H H H H H H

## SUPPORTING INFORMATION

*Hybrid A $\beta$ 0- $\alpha$ HL*

ADSD I NIKT G    TTD I GSNTT V    KTGD LV TYD K    ENGMHKKVFY    SFIDDKNHN K    K LLV I RTKG T  
 IAGQY RVYS E    EGANKSGLAW    PS AFKVQLQ L    PDN E VAQ I SD    YYPRNVVQPD    F KTI L ES P TD  
 KKV GW KVIFN    NMVNQ NWGPY    DRDSW NPVYG    NQLFM KT RNG    SMKAA DNFLD    P N KAS SL LSS  
 GFSPD FATV I    TMDRK ASKQ Q    TNIDV IYE R V    RDDYQ LHWTS    TNWKG TNTKD    KWTDR S SERY  
 KIDWE KEEMT    NDDDD DDDDH    HHHHH

*Wild-type hIAPP*    <sup>10</sup>KCNTA TCATQ<sup>10</sup>    <sup>20</sup>RLANF LVHSS<sup>20</sup>    <sup>30</sup>NNFGA ILSST<sup>30</sup>    <sup>37</sup>NVGSN TY<sup>37</sup>

*Hybrid hIAPP- $\alpha$ HL*

ADSD INIKT G    TTD I GSNTT V    KTGD LV TYDK    ENGMHKKVFY    SFIDDKNHN K    K LLV I RTKG T  
 IAGQYRVYS E    EGANKSGLAW    PS AFKVQLQL    PDN E VAQ I SD    YYPRN SIDTK    **KCNTA TCATQ**  
**RLANF LVHSS**    **NNFGA ILSST**    **NVGSN TYVQ**    PDF K T I L ESP    TDKKVGWKVI    FNNMVNQNWG  
 PYDRD SWNPV    YGNQLFMKT R    NGSMKAADNF    LDPNK A SSL L    SSGF S P DFAT    V IT MD RKASK  
 QQTNI DVIYE    RVRDDYQLHW    TSTNW KGTNT    KDKWT DRSSE    RYKID WEKEE    MTNDD DDDDD  
 DHHHHHH

**Figure S1.** The full sequences of wild type (WT)  $\alpha$ HL, WT A $\beta$ 42, a series of hybrid A $\beta$ - $\alpha$ HL peptides, WT hIAPP and hybrid hIAPP-  $\alpha$ HL. A $\beta$  amino acids substituted the transmembrane  $\beta$ -hairpin part of  $\alpha$ HL (red). The substituted A $\beta$  or hIAPP sequences were shown in blue.

## SUPPORTING INFORMATION

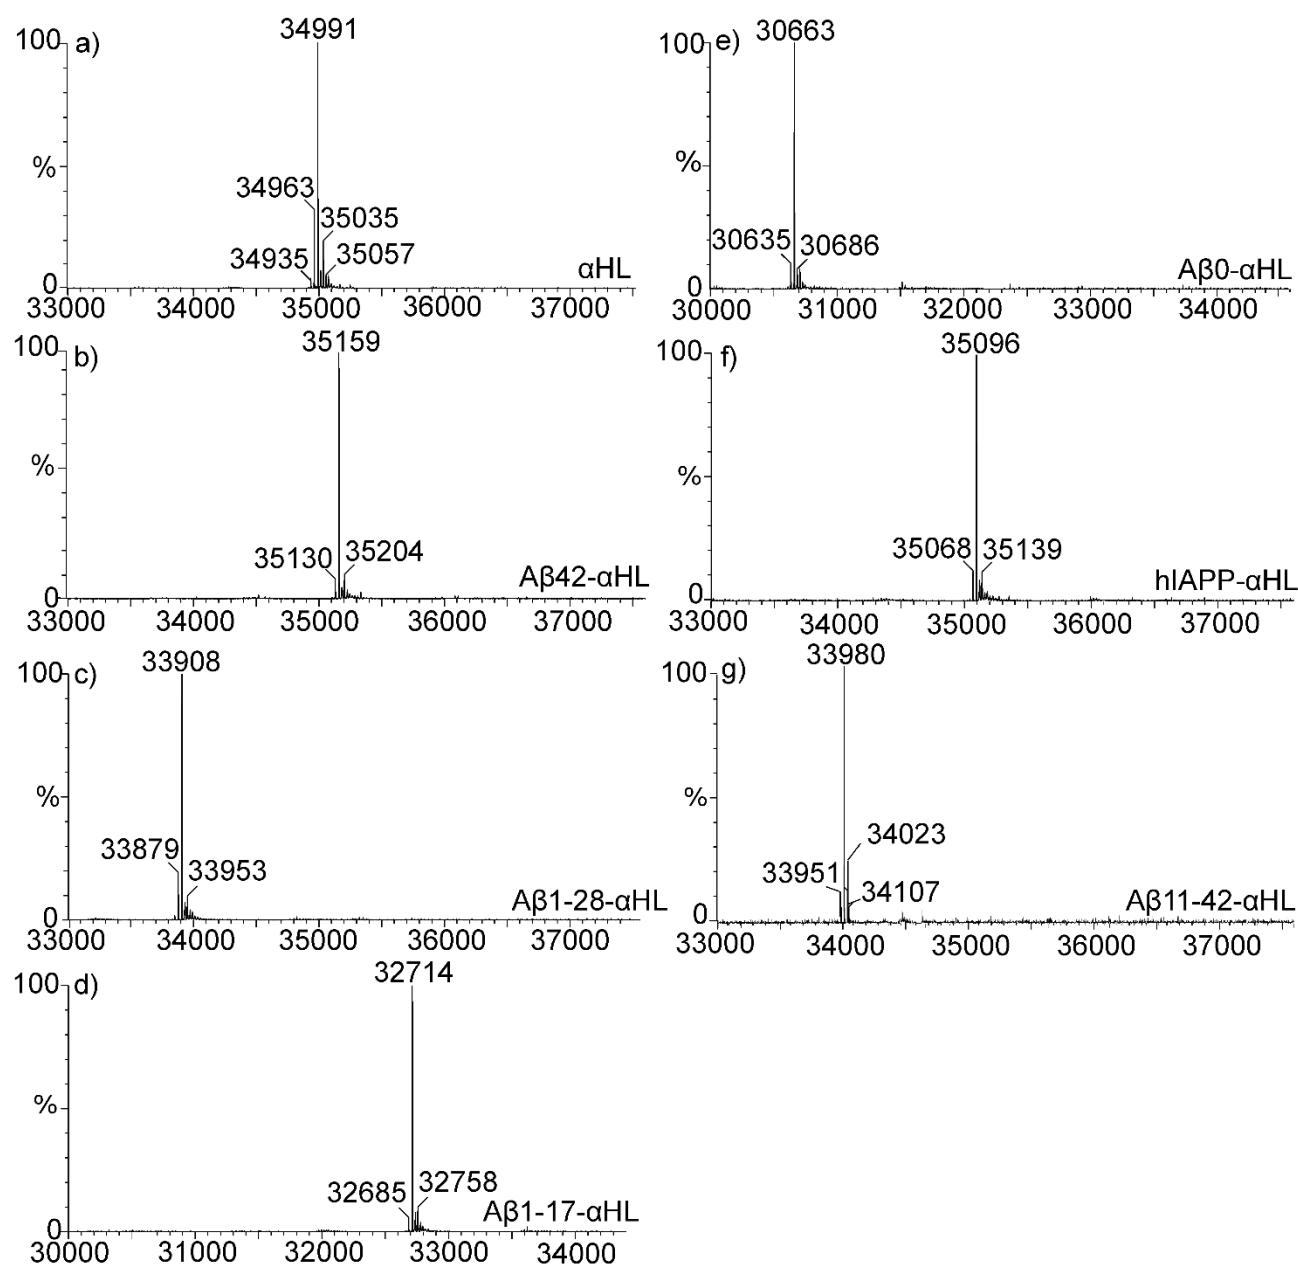

**Figure S2.** Deconvoluted mass spectrum of the purified WT αHL and a series of hybrid Aβ/hIAPP-αHL peptides. LC-MS experiments were conducted to confirm the molecule weight of a series of hybrid Aβ/hIAPP-αHL proteins including WT αHL. Results are compared to the calculated weight, which have been listed in Table S1.

## SUPPORTING INFORMATION

**Table S1.** The theoretical molecule weight of WT  $\alpha$ HL and a series of hybrid  $A\beta$ /hIAPP- $\alpha$ HL.

| Peptide                            | Calculated weight (MW)/Da | Observed [M+H] <sup>+</sup> /Da |
|------------------------------------|---------------------------|---------------------------------|
| Wild type $\alpha$ HL              | 34991                     | 34991                           |
| Hybrid $A\beta$ 42- $\alpha$ HL    | 35158                     | 35159                           |
| Hybrid $A\beta$ 11-42- $\alpha$ HL | 33980                     | 33980                           |
| Hybrid $A\beta$ 1-28- $\alpha$ HL  | 33907                     | 33908                           |
| Hybrid $A\beta$ 1-17- $\alpha$ HL  | 32712                     | 32714                           |
| Hybrid $A\beta$ 0- $\alpha$ HL     | 30662                     | 30663                           |
| Hybrid hIAPP- $\alpha$ HL          | 35095                     | 35096                           |

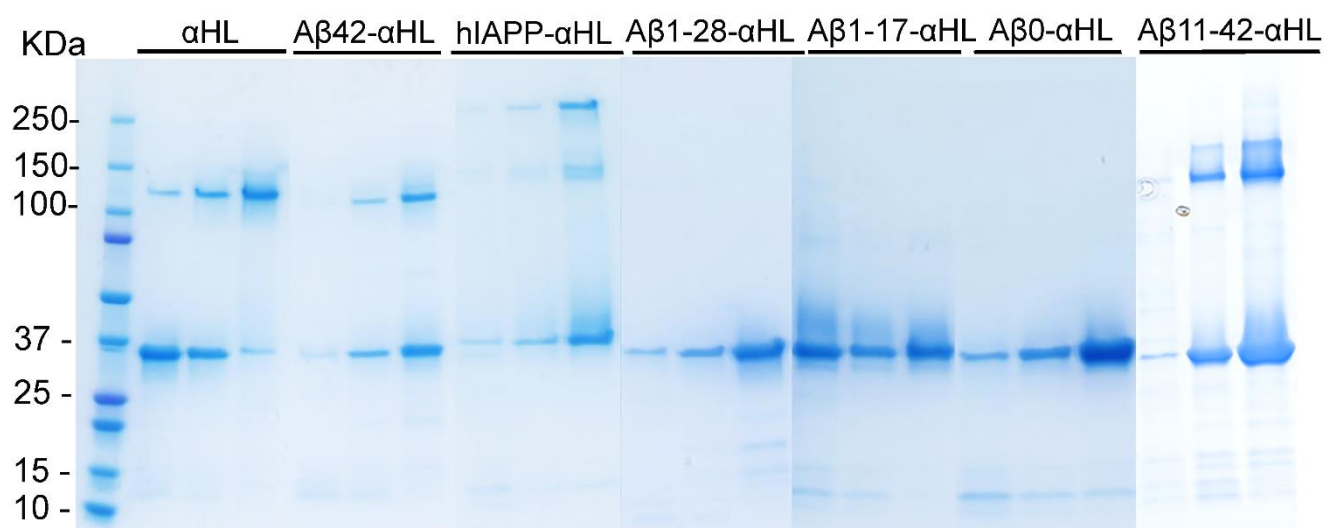**Figure S3.** Purification of WT  $\alpha$ HL and a series of hybrid  $A\beta$ /hIAPP- $\alpha$ HL proteins. All the proteins were expressed in *E. coli* and purified on the Co-NTA affinity column by using the His-tag at the C-terminus. SDS-PAGE Electrophoresis (Bio-Rad, 4-20 %) was conducted at 200 mV to monitor the protein quality. There was an imidazole concentration gradient (20 mM, 50 mM and 250 mM respectively) in the elution buffer (50 mM Tris-HCl, pH 8.0, 500 mM NaCl and 0.38 mM DDM) to separate the monomer and oligomer. The SDS-PAGE Electrophoresis was conducted at 200 V for 25 min.

## SUPPORTING INFORMATION

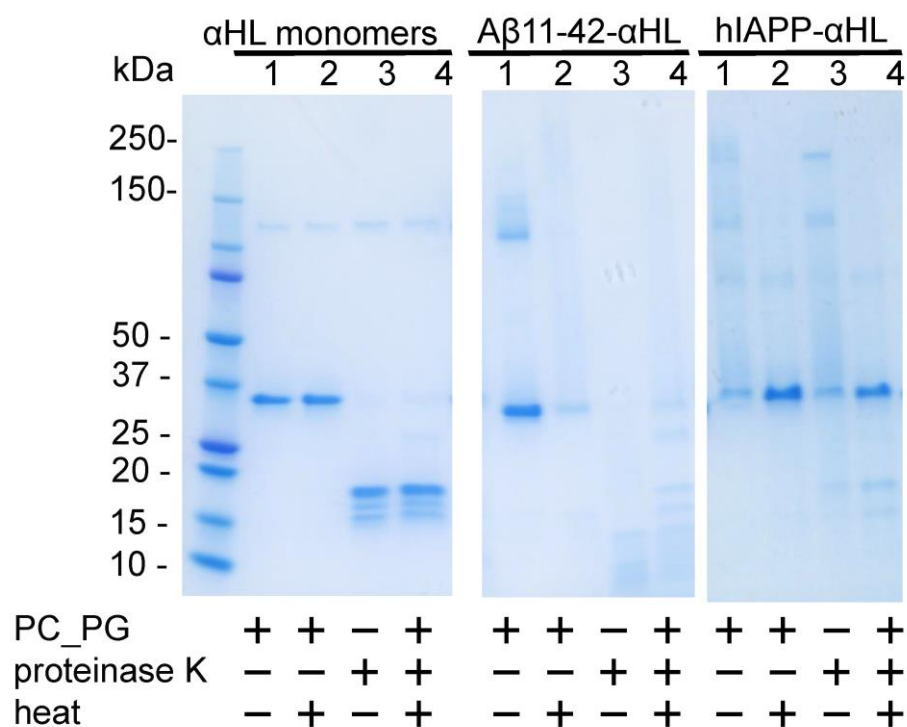

**Figure S4.** Limited proteolysis with proteinase K of the WT αHL monomers, hybrid Aβ11-42-αHL and hybrid hIAPP-αHL oligomers in the presence of DOPC:DOPG (4:1) liposomes (1 mg/ mL). For WT αHL monomers, Lane 1: αHL monomers were treated with DOPC:DOPG liposomes; lane 2: αHL monomers were treated with DOPC:DOPG liposomes and then got heat denatured at 95 °C for 15 min; lane 3: αHL monomers were digested with proteinase K; lane 4: αHL monomers treated with DOPC:DOPG liposomes were further digested by proteinase K and then heat-denatured at 95 °C. There were the same conditions for hybrid Aβ11-42-αHL and hybrid hIAPP-αHL oligomers. Monomeric WT αHL in the presence of proteinase K is taken as a control and shows more prone to breakdown, as reported previously<sup>[14]</sup>. Hybrid Aβ11-42-αHL and hybrid hIAPP-αHL oligomers exhibit the obvious proteolysis and heat denaturation.

## SUPPORTING INFORMATION

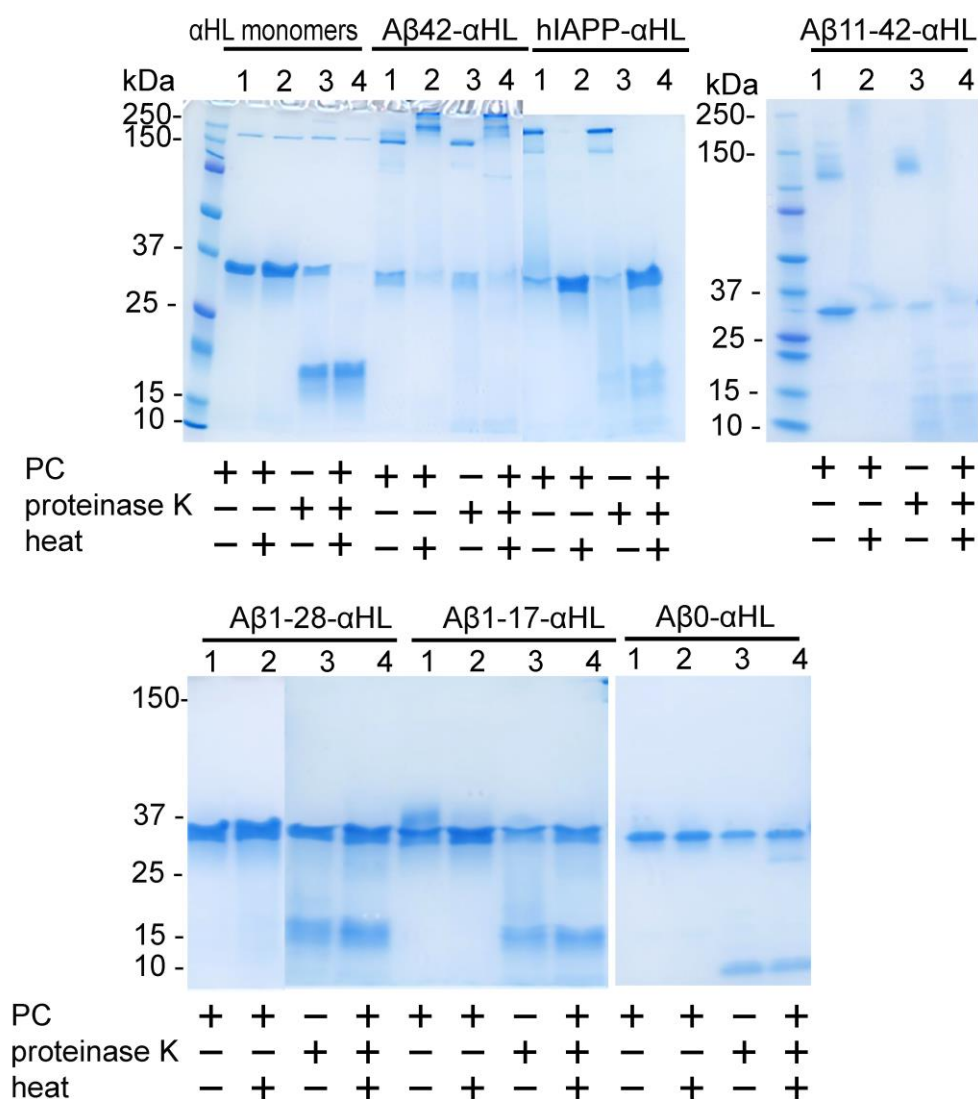

**Figure S5.** Limited proteolysis with proteinase K of WT  $\alpha$ HL monomers and hybrid A $\beta$ /hiAPP- $\alpha$ HL oligomers in the presence of DPhPC liposomes (1 mg/mL). For  $\alpha$ HL, Lane 1:  $\alpha$ HL monomers were treated with DPhPC liposomes; lane 2:  $\alpha$ HL monomers were treated with DPhPC liposomes and then got heat denatured at 95 °C for 15 min; lane 3:  $\alpha$ HL monomers were digested with proteinase K; lane 4:  $\alpha$ HL monomers treated with DPhPC liposomes were further digested by proteinase K and then heat-denatured at 95 °C. There were the same conditions for hybrid A $\beta$ /hiAPP- $\alpha$ HL proteins.

## SUPPORTING INFORMATION

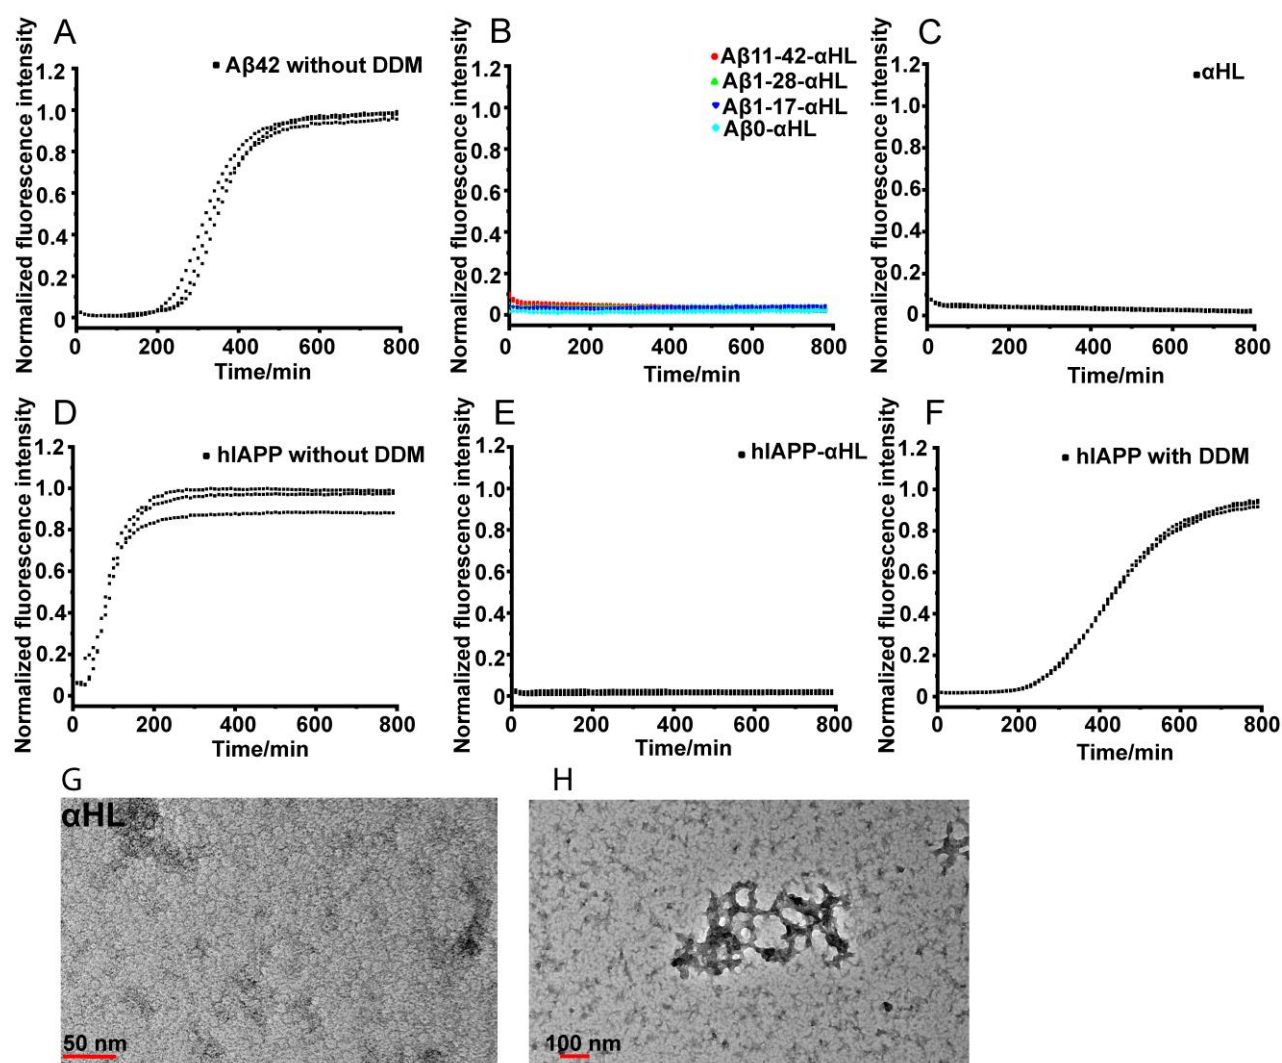

**Figure S6.** ThT fibrillation kinetics of the WT amyloid peptides,  $\alpha$ HL displayed A $\beta$ , or WT  $\alpha$ HL proteins (A-F) and TEM images of WT  $\alpha$ HL oligomers (G) as well as the amorphous aggregates of hybrid A $\beta$ 42- $\alpha$ HL (H). Higher ThT fluorescence intensity indicates more fibril formation. (A) WT A $\beta$ 42 in the buffer of 50 mM Tris-HCl, pH 8.0, 0.5 M NaCl and 250 mM imidazole. (B) A series of hybrid A $\beta$ - $\alpha$ HL oligomers including A $\beta$ 11-42- $\alpha$ HL, A $\beta$ 1-28- $\alpha$ HL, A $\beta$ 1-17- $\alpha$ HL or A $\beta$ 0- $\alpha$ HL, prepared in the same condition as A $\beta$ 42- $\alpha$ HL in Figure 3B (50 mM Tris-HCl, pH 8.0, 500 mM NaCl, 250 mM imidazole and 0.38 mM DDM). (C) WT  $\alpha$ HL in the buffer of 50 mM Tris-HCl, pH 8.0, 0.5 M NaCl, 250 mM imidazole and 0.38 mM DDM. (D) WT hIAPP amyloid aggregation assay in the buffer of 50 mM Tris-HCl, pH 8.0, 0.5 M NaCl, 250 mM imidazole. (E) Hybrid hIAPP- $\alpha$ HL or (F) WT hIAPP was used for the kinetic assay in the buffer of 50 mM Tris-HCl, pH 8.0, 0.5 M NaCl, 250 mM imidazole and 0.38 mM DDM. The ratio of ThT and proteins was 4:1 with a ThT final concentration at 40  $\mu$ M. The excitation and emission filters were 430 and 480 nm, respectively. (G-H) The samples were obtained from the end of ThT kinetics for TEM imaging. Scale bars of WT  $\alpha$ HL oligomers (G) and the amorphous aggregates of hybrid A $\beta$ 42- $\alpha$ HL (H) are 50 nm and 100 nm respectively.

## SUPPORTING INFORMATION

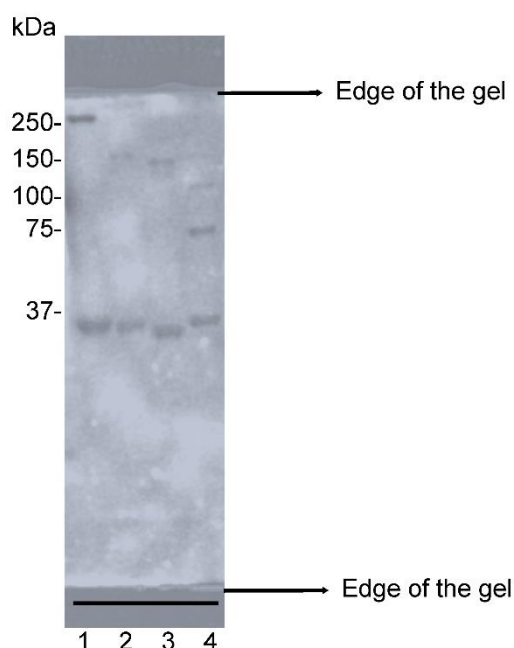

**Figure S7.** Immunogenic similarity of WT  $\alpha$ HL, hybrid A $\beta$ 42/11-42- $\alpha$ HL and hybrid hIAPP-  $\alpha$ HL by western blot. The anti-A $\beta$ 42 oligomer conformation-dependent antibody A11 recognized  $\alpha$ HL oligomers (lane 1); hybrid A $\beta$ 42- $\alpha$ HL oligomers (lane 2); hybrid A $\beta$ 11-42- $\alpha$ HL oligomers (lane 3); hybrid hIAPP- $\alpha$ HL oligomers (lane 4). The SDS-PAGE electrophoresis prior to blotting, was conducted at 120 V for 80 min. No bands with molecule weight lower than the monomer bands (around 30-35 kDa) were found on the gel.

## SUPPORTING INFORMATION

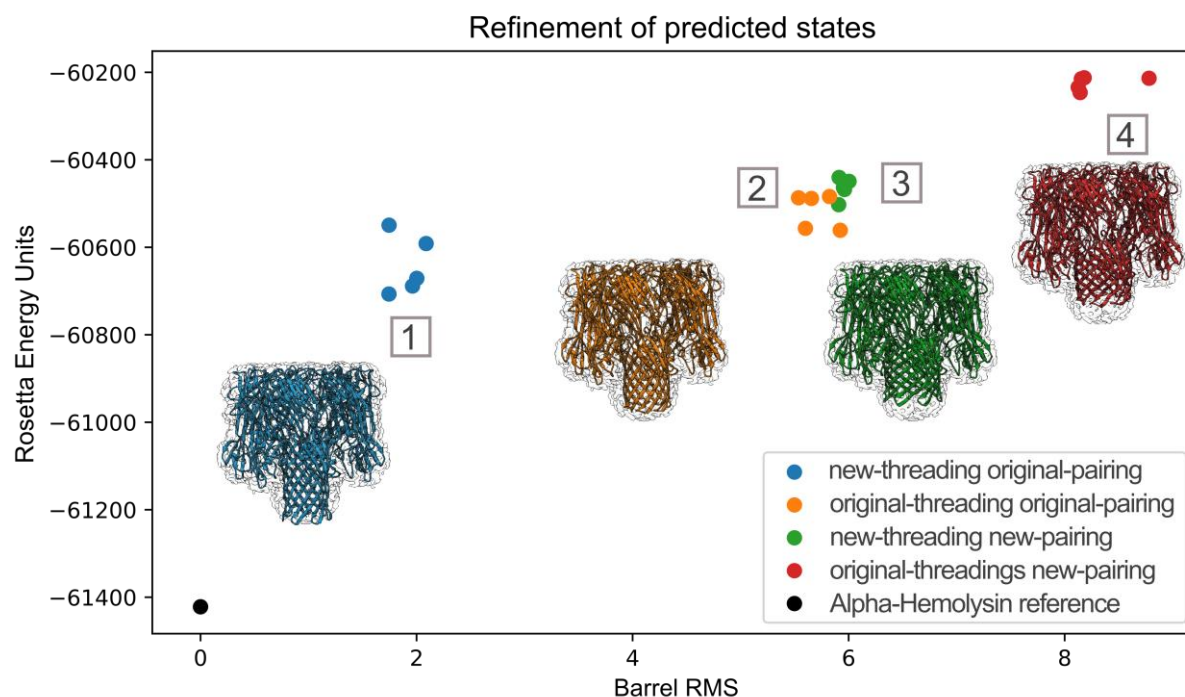

**Figure S8.** Total score comparison between the four assessed states of the A $\beta$ - $\alpha$ HL chimera as evaluated by the Rosetta full atom score function (lower score is better/more stable). The x-axis is the RMS (Root Mean Square) deviation of our models to the  $\alpha$ HL (PDB: 7AHL) scaffold, and each of the clusters of points represent a particular modeled conformation of our A $\beta$ 42- $\alpha$ HL. The y-axis represents the energy landscape of the possible conformations of A $\beta$ 42 region on the  $\alpha$ HL scaffold, given the low-resolution electron density. We found the models to be ranked as follows: 1. original  $\beta$ -barrel strand pairing with custom alignment (blue), 2. original  $\beta$ -barrel strand pairing with hhpred alignment (orange), 3. shifted  $\beta$ -barrel strand pairing with custom alignment (green), 4. shifted  $\beta$ -barrel strand pairing with hhpred alignment (red).

## SUPPORTING INFORMATION

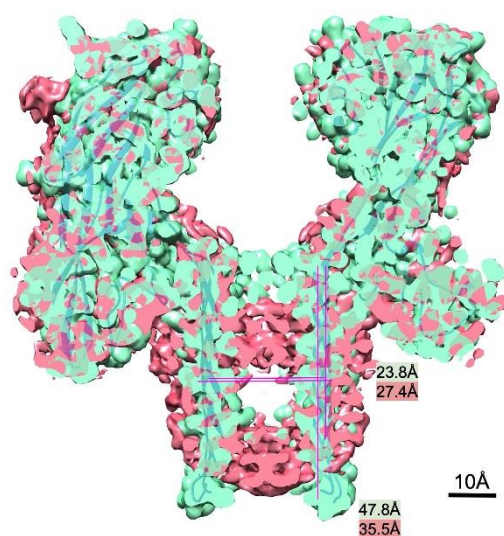

**Figure S9.** Map superposition of WT  $\alpha$ HL (green) and the hybrid A $\beta$ 42- $\alpha$ HL (red). The hybrid A $\beta$ 42- $\alpha$ HL  $\beta$ -barrel pore has a shorter length (35.5 Å) and a similar inner diameter (27.4 Å) of the largest circular cross-section, compared to the WT  $\alpha$ HL barrel (47.8 Å high and 23.8 Å wide).

## SUPPORTING INFORMATION

Table S2. Structure refinement by Phenix software

| Model                                    |                             |
|------------------------------------------|-----------------------------|
| Composition (#)                          |                             |
| Chains                                   | 7                           |
| Atoms                                    | 32434 (Hydrogens: 15921)    |
| Residues                                 | Protein: 2051 Nucleotide: 0 |
| Water                                    | 0                           |
| Ligands                                  | 0                           |
| Bonds (RMSD)                             |                             |
| Length (Å) (# > 4σ)                      | 0.007 (0)                   |
| Angles (°) (# > 4σ)                      | 0.560 (0)                   |
| MolProbity score                         | 1.35                        |
| Clash score                              | 4.28                        |
| Ramachandran plot (%)                    |                             |
| Outliers                                 | 0                           |
| Allowed                                  | 2.75                        |
| Favored                                  | 97.25                       |
| Rama-Z (Ramachandran plot Z-score, RMSD) |                             |
| Whole (N = 2037)                         | 0.21 (0.18)                 |
| Helix (N = 42)                           | 4.43 (0.08)                 |
| Sheet (N = 1057)                         | 0.32 (0.16)                 |
| Loop (N = 938)                           | 0.35 (0.20)                 |
| Rotamer outliers (%)                     | 0.39                        |
| Cβ outliers (%)                          | 0                           |
| Peptide plane (%)                        |                             |
| Cis proline/general                      | 11.1/0.0                    |
| Twisted proline/general                  | 0.0/0.0                     |
| CaBLAM outliers (%)                      | 0.69                        |
| ADP (B-factors)                          |                             |
| Iso/Aniso (#)                            | 16513/0                     |
| min/max/mean                             |                             |
| Protein                                  | 28.63/173.52/59.28          |
| Nucleotide                               | ---                         |
| Ligand                                   | ---                         |
| Water                                    | ---                         |
| Occupancy                                |                             |
| Mean                                     | 1                           |
| occ = 1 (%)                              | 100                         |
| 0 < occ < 1 (%)                          | 0                           |
| occ > 1 (%)                              | 0                           |
| Data                                     |                             |
| Box                                      |                             |
| Lengths (Å)                              | 112.27, 112.27, 111.24      |
| Angles (°)                               | 90.00, 90.00, 90.00         |
| Supplied Resolution (Å)                  | 3.3                         |
| Resolution Estimates (Å)                 | Masked Unmasked             |
| d FSC (half maps; 0.143)                 | ---                         |
| d 99 (full/half1/half2)                  | 3.4/---/---                 |
| d model                                  | 3.3 3.3                     |
| d FSC model (0/0.143/0.5)                | 2.7/3.1/3.3 2.7/3.1/3.3     |
| Map min/max/mean                         | -0.08/0.14/0.00             |
| Model vs. Data                           |                             |
| CC (mask)                                | 0.8                         |
| CC (box)                                 | 0.73                        |
| CC (peaks)                               | 0.74                        |
| CC (volume)                              | 0.79                        |

## SUPPORTING INFORMATION

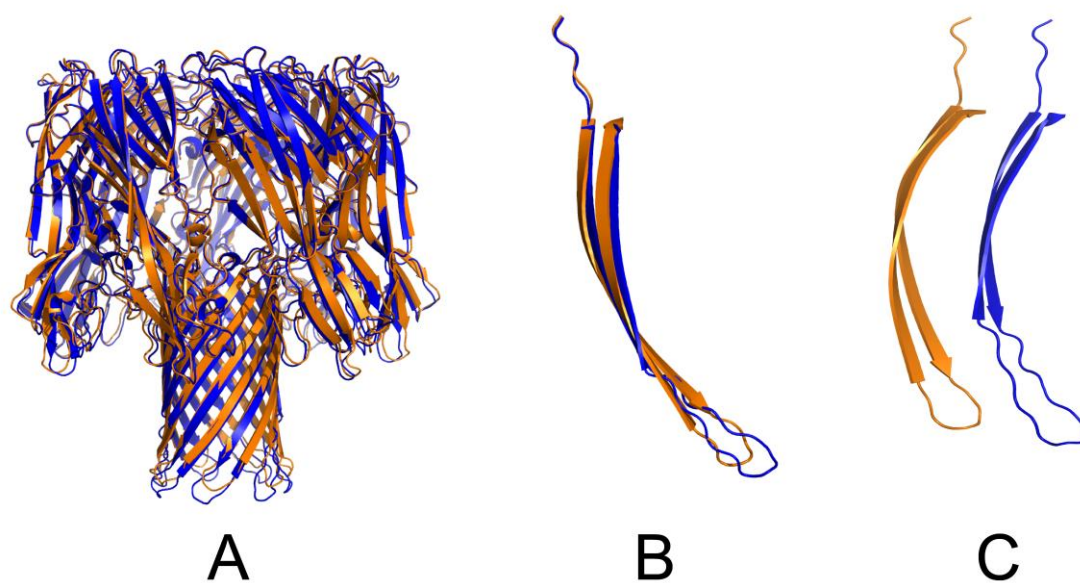

**Figure S10.** A: Superposition of heptameric Aβ42 displayed on the αHL scaffold (in orange) and WT αHL (in blue). B-C: Comparison of the displayed Aβ42 sequence (in orange) and αHL pre-stem domain (residues 106-147 in blue).

## SUPPORTING INFORMATION

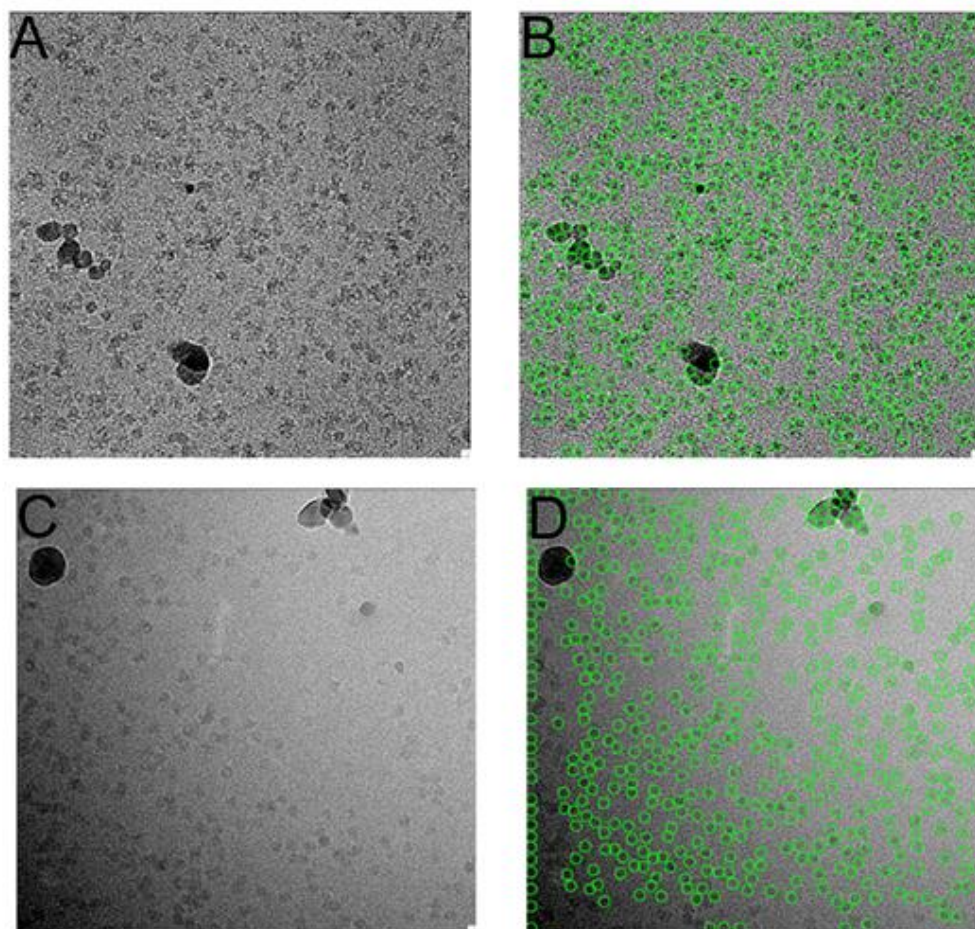

**Figure S11.** The visualization of hybrid Aβ42-αHL particles in two regions by cryo-EM. 2'438'446 particles (green box) from 4'284 micrographs were automatically picked by RELION 3.0.

## SUPPORTING INFORMATION

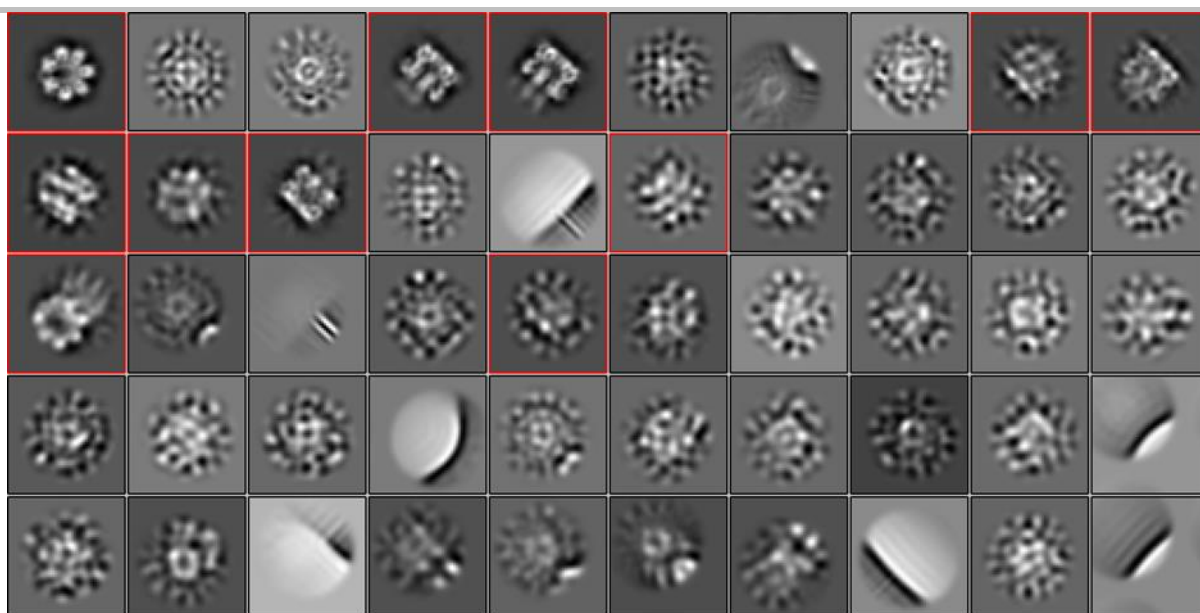

**Figure S12.** The primary 2D classification of hybrid A $\beta$ 42- $\alpha$ HL particles. Some classes that are not framed in red boxes contained noise or contamination and thus were dropped before proceeding on the density map. The particles being framed in the red box were used for 3D auto-refine and the beam tilt values for the entire data set.

## References

- [1] O. K. Castell, J. Berridge, M. I. Wallace, *Angew Chem Int Ed Engl* **2012**, *51*, 3134-3138.
- [2] aC. Wallin, Y. Hiruma, S. K. T. S. Wärmländer, I. Huvent, J. Jarvet, J. P. Abrahams, A. Gräslund, G. Lippens, J. Luo, *Journal of the American Chemical Society* **2018**, *140*, 8138-8146; bH. Wang, M. Lallemand, B. Hermann, C. Wallin, R. Loch, A. Blanc, B. N. Balzer, T. Hugel, J. Luo, *Journal of Molecular Biology* **2021**, *433*, 166717.
- [3] K. Broersen, W. Jonckheere, J. Rozenski, A. Vandersteen, K. Pauwels, A. Pastore, F. Rousseau, J. Schymkowitz, *Protein Eng Des Sel* **2011**, *24*, 743-750.
- [4] J. Luo, I. Mohammed, S. K. T. S. Wärmländer, Y. Hiruma, A. Gräslund, J. P. Abrahams, *Biomacromolecules* **2014**, *15*, 1985-1991.
- [5] J. Zivanov, T. Nakane, B. O. Forsberg, D. Kimanius, W. J. Hagen, E. Lindahl, S. H. Scheres, *Elife* **2018**, *7*.
- [6] N. Biyani, R. D. Righetto, R. McLeod, D. Caujolle-Bert, D. Castano-Diez, K. N. Goldie, H. Stahlberg, *J Struct Biol* **2017**, *198*, 124-133.
- [7] X. Li, P. Mooney, S. Zheng, C. R. Booth, M. B. Braunfeld, S. Gubbens, D. A. Agard, Y. Cheng, *Nature methods* **2013**, *10*, 584-590.
- [8] S. H. Scheres, *J Struct Biol* **2012**, *180*, 519-530.
- [9] B. Webb, A. Sali, *Curr Protoc Bioinformatics* **2016**, *54*, 5.6.1-5.6.37.
- [10] S. J. Fleishman, A. Leaver-Fay, J. E. Corn, E.-M. Strauch, S. D. Khare, N. Koga, J. Ashworth, P. Murphy, F. Richter, G. Lemmon, J. Meiler, D. Baker, *PLOS ONE* **2011**, *6*, e20161.
- [11] M. Steinegger, M. Meier, M. Mirdita, H. Vöhringer, S. J. Haunsberger, J. Söding, *BMC Bioinformatics* **2019**, *20*, 473.
- [12] E. F. Pettersen, T. D. Goddard, C. C. Huang, G. S. Couch, D. M. Greenblatt, E. C. Meng, T. E. Ferrin, *J Comput Chem* **2004**, *25*, 1605-1612.
- [13] Y. Song, F. DiMaio, R. Y. Wang, D. Kim, C. Miles, T. Brunette, J. Thompson, D. Baker, *Structure* **2013**, *21*, 1735-1742.
- [14] E. Gouaux, *J Struct Biol* **1998**, *121*, 110-122.

## Author Contributions

Jinming Wu: Investigation, validation, project administration. Thorsten B. Blum: Investigation, validation. Daniel P Farrell and Frank DiMaio: Investigation, validation. Jan Pieter Abrahams: data analysis, validation. Jinghui Luo: Conceptualization, validation, the project administration and funding acquisition.
